# Supplementary material
Source: PubMed Central journal article supplement (PMC5381181)
Supplement: ijsem-66-4744-s001.pdf [file ijsem-66-4744-s001.pdf]

***Bacillus wiedmannii* sp. nov. is a new psychrotolerant and cytotoxic *Bacillus cereus* group species isolated from dairy foods and environments in the USA**

Rachel A. Miller<sup>1</sup>, Sarah M. Beno<sup>1</sup>, David J. Kent<sup>1</sup>, Laura M. Carroll<sup>1</sup>, Nicole H. Martin<sup>1</sup>, Kathryn J. Boor<sup>1</sup>, and Jasna Kovac<sup>1\*</sup>

<sup>1</sup>Department of Food Science, Cornell University, Ithaca NY 14853, USA

**\*Corresponding Author:** Jasna Kovac, 324 Stocking Hall, Cornell University, Ithaca, NY, 14850, Phone: +1 607 254 2838, Fax: +1 607 254 4868, [jk2739@cornell.edu](mailto:jk2739@cornell.edu)

**Journal:** International Journal of Systematic and Evolutionary Microbiology

**Fig. S1: Maximum likelihood tree constructed based on 632 bp long *rpoB* sequences using generalized time reversible evolutionary model (GTR) with gamma distributed sites and 1000 bootstrap repetitions in RaxML, rooted by mid-point.**

Bootstrap values above >15 are displayed on branches. The bar represents 0.01 substitutions per site. The representative isolates of *B. wiedmannii* sp. nov. are shown in bold type.

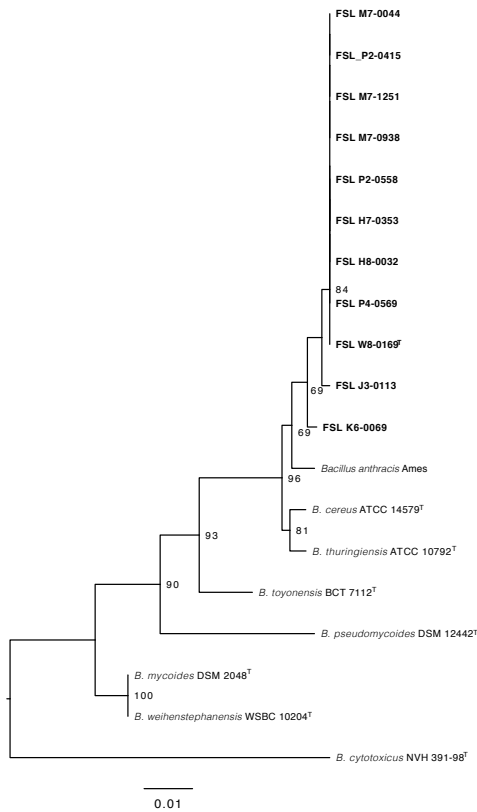

**Table S1.** NCBI accession numbers for 16S rRNA gene and whole genome sequences (WGS) used in phylogenetic analyses

| NCBI sequence accession number | Strain                                                             | 16S rRNA/WGS |
|--------------------------------|--------------------------------------------------------------------|--------------|
| NR_043774.1                    | <i>Bacillus acidicer</i> CBD 119 <sup>T</sup>                      | 16S rRNA     |
| NR_041379.1                    | <i>B. panaciterrae</i> Gsoil 1517 <sup>T</sup>                     | 16S rRNA     |
| NR_029077.1                    | <i>Bacillus algicola</i> F12                                       | 16S rRNA     |
| NR_112685.1                    | <i>Bacillus amyloliquefaciens</i> NBRC 15535                       | 16S rRNA     |
| NR_024689.1                    | <i>Bacillus atrophaeus</i> JCM 9070 <sup>T</sup>                   | 16S rRNA     |
| NR_026140.1                    | <i>Bacillus clausii</i> DSM 8716 <sup>T</sup>                      | 16S rRNA     |
| NR_026138.1                    | <i>Bacillus cohnii</i> DSM 6307 <sup>T</sup>                       | 16S rRNA     |
| NR_042274.1                    | <i>Bacillus foraminis</i> CV53 <sup>T</sup>                        | 16S rRNA     |
| NR_042905.1                    | <i>Bacillus fortis</i> R-6514 <sup>T</sup>                         | 16S rRNA     |
| NR_025370.1                    | <i>Bacillus fumarioli</i> LMG 17489 <sup>T</sup>                   | 16S rRNA     |
| NR_028624.1                    | <i>Bacillus funiculus</i> NAF001 <sup>T</sup>                      | 16S rRNA     |
| NR_044193.1                    | <i>Bacillus ginsengi</i> get14 <sup>T</sup>                        | 16S rRNA     |
| NR_025446.1                    | <i>Bacillus halodurans</i> DSM 497 <sup>T</sup>                    | 16S rRNA     |
| NR_040848.1                    | <i>Bacillus hemicellulosilyticus</i> C-11 <sup>T</sup>             | 16S rRNA     |
| NR_025626.1                    | <i>Bacillus humi</i> LMG 22167 <sup>T</sup>                        | 16S rRNA     |
| NR_029022.1                    | <i>Bacillus indicus</i> Sd/3 <sup>T</sup>                          | 16S rRNA     |
| NR_025060.1                    | <i>Bacillus jeotgali</i> YKJ-10 <sup>T</sup>                       | 16S rRNA     |
| NR_074923.1                    | <i>Bacillus licheniformis</i> ATCC 14580 <sup>T</sup>              | 16S rRNA     |
| NR_025511.1                    | <i>Bacillus luciferensis</i> LMG 18422 <sup>T</sup>                | 16S rRNA     |
| KJ569088.1                     | <i>Bacillus megaterium</i> IAM 13418 <sup>T</sup>                  | 16S rRNA     |
| NR_040985.1                    | <i>Bacillus methanolicus</i> NCIMB 13113 <sup>T</sup>              | 16S rRNA     |
| AJ542512.1                     | <i>Bacillus novalis</i> LMG 21837 <sup>T</sup>                     | 16S rRNA     |
| NR_026145.1                    | <i>Bacillus pseudocaliphilus</i> DSM 8725 <sup>T</sup>             | 16S rRNA     |
| NR_026139.1                    | <i>Bacillus pseudofirmus</i> DSM 8715 <sup>T</sup>                 | 16S rRNA     |
| NR_043242.1                    | <i>Bacillus pumilus</i> ATCC 7061 <sup>T</sup>                     | 16S rRNA     |
| KJ812207.1                     | <i>Bacillus subtilis</i> subs. <i>subtilis</i> DSM 10 <sup>T</sup> | 16S rRNA     |
| NR_025595.1                    | <i>Bacillus gelatini</i> LMG 21880 <sup>T</sup>                    | 16S rRNA     |
| NR_040794.1                    | <i>Geobacillus stearothermophilus</i> IFO12550 <sup>T</sup>        | 16S rRNA     |
| NC_004722.1                    | <i>Bacillus cereus</i> ATCC 14579 <sup>T</sup>                     | WGS          |
| NC_003997.3                    | <i>Bacillus anthracis</i> Ames                                     | WGS          |
| NZ_CM000753.1                  | <i>Bacillus thuringiensis</i> ATCC 10792 <sup>T</sup>              | WGS          |
| NZ_CP009746.1                  | <i>Bacillus weihenstephanensis</i> WSBC 10204 <sup>T</sup>         | WGS          |
| NZ_CM000745.1                  | <i>Bacillus pseudomycooides</i> DSM 12442 <sup>T</sup>             | WGS          |
| NZ_CM000742.1                  | <i>Bacillus mycooides</i> ATCC 6462 <sup>T</sup>                   | WGS          |
| NC_009674.1                    | <i>Bacillus cytotoxicus</i> NVH 391-98 <sup>T</sup>                | WGS          |
| CP006863.1                     | <i>Bacillus toyonensis</i> BCT-7112 <sup>T</sup>                   | WGS          |
| KU198626/SRX1297474            | <i>Bacillus wiedmannii</i> sp. nov. FSL W8-0169 <sup>T</sup>       | 16S rRNA/WGS |

**Table S2.** Predicted DNA-DNA hybridization (DDH) between *B. wiedmannii* sp. nov. type strain FSL W8-0169<sup>T</sup> and representative strains of other *B. cereus* group species

DDH represents predicted DNA-DNA Hybridization values calculated using formula 2 of Genome-to-Genome Distance Calculator (GGDC 2.1; Meier-Kolthoff et al., 2013), which is recommended for draft genome analysis.

| Isolate                                              | DDH <sup>a</sup> | Model C.I. <sup>b</sup> | Bootstrap C.I. <sup>b</sup> | Distance | Prob. <sup>c</sup> DDH ≥ 70% |
|------------------------------------------------------|------------------|-------------------------|-----------------------------|----------|------------------------------|
| <i>B. anthracis</i> Ames                             | 50.9             | 48.2 - 53.5%            | 50.8 - 50.9%                | 0.0697   | 21.52                        |
| <i>B. cereus</i> ATCC 14579 <sup>T</sup>             | 44               | 41.5 - 46.6%            | 44 - 44%                    | 0.0871   | 6.74                         |
| <i>B. cytotoxicus</i> NVH 391-98 <sup>T</sup>        | 25.5             | 23.2 - 28%              | 25.5 - 25.5%                | 0.1703   | 0.01                         |
| <i>B. mycoides</i> DSM 2048 <sup>T</sup>             | 40.5             | 38 - 43%                | 40.5 - 40.5%                | 0.0978   | 3.06                         |
| <i>B. pseudomycooides</i> DSM 12442 <sup>T</sup>     | 27               | 24.7 - 29.5%            | 27 - 27.1%                  | 0.1598   | 0.03                         |
| <i>B. thuringiensis</i> ATCC 10792 <sup>T</sup>      | 44               | 41.4 - 46.5%            | 44 - 44%                    | 0.0872   | 6.68                         |
| <i>B. toyonensis</i> BCT-7112 <sup>T</sup>           | 44               | 41.5 - 46.6%            | 44 - 44%                    | 0.087    | 6.75                         |
| <i>B. weihenstephanensis</i> WSBC 10204 <sup>T</sup> | 40.4             | 37.9 - 42.9%            | 40.4 - 40.4%                | 0.0981   | 3                            |
| " <i>Bacillus gaemokensis</i> " KCTC 13318           | 26.3             | 24 - 28.8%              | 26.3 - 26.3%                | 0.1645   | 0.02                         |
| " <i>B. manliponensis</i> " JCM 15802                | 22.4             | 20.1 - 24.8%            | 22.4 - 22.4%                | 0.1959   | 0                            |
| " <i>B. bingmayongensis</i> " FJAT-13831             | 26.9             | 24.5 - 29.4%            | 26.9 - 26.9%                | 0.1608   | 0.03                         |
| FSL J3-0113                                          | 66.3             | 63.4 - 69.2%            | 66.3 - 66.4%                | 0.0414   | 70.68                        |
| FSL H7-0353                                          | 88.1             | 85.6 - 90.2%            | 88 - 88.1%                  | 0.0142   | 95.09                        |
| FSL H8-0032                                          | 88               | 85.5 - 90.2%            | 88 - 88.1%                  | 0.0143   | 95.09                        |
| FSL M7-0044                                          | 95.1             | 93.5 - 96.3%            | 95.1 - 95.1%                | 0.0066   | 97.22                        |
| FSL M7-0938                                          | 94.5             | 92.8 - 95.8%            | 94.5 - 94.5%                | 0.0072   | 97.08                        |
| FSL M7-1251                                          | 88.8             | 86.3 - 90.8%            | 88.8 - 88.8%                | 0.0135   | 95.36                        |
| FSL P2-0415                                          | 89.2             | 86.8 - 91.2%            | 89.2 - 89.2%                | 0.013    | 95.51                        |
| FSL P2-0558                                          | 89.7             | 87.4 - 91.7%            | 89.7 - 89.7%                | 0.0124   | 95.7                         |
| FSL P4-0569                                          | 88.5             | 86 - 90.6%              | 88.5 - 88.5%                | 0.0138   | 95.25                        |
| FSL K6-0069                                          | 57.9             | 55.1 - 60.7%            | 57.9 - 57.9%                | 0.0553   | 45.24                        |

<sup>a</sup> DDH represents predicted DNA-DNA Hybridization values calculated using formula 2, which is appropriate for draft genome analysis, as it does not depend on the genome length.

<sup>b</sup> C.I. is estimated confidence interval.

<sup>c</sup> Prob. is probability of DDH being equal or above 70%, which is set as a species cut-off

**Table S3.** Results of phenotypic characterization of all *Bacillus wiedmannii* sp. nov. strains included in this study. Only carbohydrates for which acid production was observed for at least one of the strains, are reported. A “+” indicates the isolate was positive for a given characteristic, and “-” indicates the isolate was negative for a given characteristic. The *B. cereus* ATCC 14579 was included as a control.

| Isolate ID  | General Characteristics |                           |                          |                    |                      |         |          |                   |                   |             |             |                 |                |                      |                       |               |                   |
|-------------|-------------------------|---------------------------|--------------------------|--------------------|----------------------|---------|----------|-------------------|-------------------|-------------|-------------|-----------------|----------------|----------------------|-----------------------|---------------|-------------------|
|             | Source                  | Cytotoxicity <sup>a</sup> | Growth Temperature Range | Growth Range of pH | Maximum % NaCl (w/v) | Oxidase | Catalase | Casein Hydrolysis | Starch Hydrolysis | NHE Duopath | HBL Duopath | PI-PLC activity | Hemolysis 35°C | Lecithinase activity | Anaerobic growth 30°C | Motility 30°C | Nitrate Reduction |
| FSL H7-0353 | Pasteurized milk        | +                         | 5-43°C                   | pH 5-10            | 5%                   | -       | +        | +                 | +                 | +           | +           | +               | +              | +                    | +                     | -             | -                 |
| FSL H8-0032 | Pasteurized milk        | +                         | 5-43°C                   | pH 5-10            | 5%                   | -       | +        | +                 | +                 | +           | +           | +               | +              | +                    | +                     | +             | -                 |
| FSL P2-0415 | Raw milk                | +                         | 10-43°C                  | pH 5-10            | 2%                   | -       | +        | +                 | +                 | +           | +           | +               | +              | +                    | +                     | +             | +                 |
| FSL P2-0558 | Raw milk                | +                         | 5-43°C                   | pH 5-10            | 5%                   | -       | +        | +                 | +                 | +           | +           | +               | +              | +                    | +                     | +             | +                 |
| FSL P4-0569 | Raw milk                | +                         | 5-40°C                   | pH 5-10            | 2%                   | -       | +        | +                 | +                 | +           | -           | +               | +              | +                    | +                     | +             | +                 |
| FSL M7-0044 | Raw milk                | +                         | 10-43°C                  | pH 5-10            | 2%                   | -       | +        | +                 | +                 | +           | +           | +               | +              | +                    | +                     | +             | +                 |
| FSL M7-0938 | Raw milk                | +                         | 10-40°C                  | pH 5-10            | 5%                   | -       | +        | +                 | +                 | +           | +           | +               | +              | +                    | +                     | +             | +                 |
| FSL M7-1251 | Raw milk                | +                         | 10-40°C                  | pH 5-10            | 5%                   | -       | +        | +                 | +                 | +           | +           | +               | +              | +                    | +                     | +             | +                 |
| FSL W8-0169 | Raw milk                | +                         | 5-43°C                   | pH 5-10            | 5%                   | -       | +        | +                 | +                 | +           | +           | +               | +              | +                    | +                     | +             | +                 |
| FSL J3-0113 | Pasteurized milk        | +                         | 10-40°C                  | pH 5-10            | 2%                   | -       | +        | +                 | +                 | +           | -           | +               | +              | +                    | +                     | +             | +                 |
| FSL K6-0069 | Raw milk                | +                         | 10-40°C                  | pH 5-10            | 5%                   | -       | +        | +                 | +                 | +           | -           | +               | +              | +                    | +                     | +             | -                 |
| ATCC 14579  | Air in a cow shed       | +                         | 10-45°C                  | pH 5-10            | 5%                   | -       | +        | +                 | +                 | +           | +           | +               | +              | +                    | +                     | +             | +                 |

**Table S3 continued.**

| Isolate ID  | API 20E Biochemical Characterizations |     |     |     |     |     |      |     |        |    |            |
|-------------|---------------------------------------|-----|-----|-----|-----|-----|------|-----|--------|----|------------|
|             | ONPG                                  | ADH | LDC | ODC | CIT | H2S | Urea | TDA | Indole | VP | Gelatinase |
| FSL H7-0353 | -                                     | -   | -   | -   | +   | -   | -    | -   | -      | +  | +          |
| FSL H8-0032 | -                                     | -   | -   | -   | -   | -   | -    | -   | -      | +  | +          |
| FSL P2-0415 | -                                     | -   | -   | -   | +   | -   | -    | -   | -      | +  | +          |
| FSL P2-0558 | -                                     | -   | -   | -   | +   | -   | -    | -   | -      | +  | +          |
| FSL P4-0569 | -                                     | -   | -   | -   | -   | -   | -    | -   | -      | +  | +          |
| FSL M7-0044 | -                                     | -   | -   | -   | -   | -   | -    | -   | -      | +  | +          |
| FSL M7-0938 | -                                     | -   | -   | -   | -   | -   | -    | -   | -      | +  | +          |
| FSL M7-1251 | -                                     | -   | -   | -   | +   | -   | -    | -   | -      | +  | +          |
| FSL W8-0169 | -                                     | -   | -   | -   | +   | -   | -    | -   | -      | +  | +          |
| FSL J3-0113 | -                                     | -   | -   | -   | -   | -   | -    | -   | -      | +  | +          |
| FSL K6-0069 | -                                     | -   | -   | -   | +   | -   | -    | -   | -      | +  | +          |
| ATCC 14579  | -                                     | +   | -   | -   | -   | -   | -    | -   | -      | +  | +          |

Table S3 continued.

| 50CH Biochemical Characterizations <sup>b</sup> |          |           |            |           |                         |           |         |                              |         |              |           |              |             |        |          |                        |
|-------------------------------------------------|----------|-----------|------------|-----------|-------------------------|-----------|---------|------------------------------|---------|--------------|-----------|--------------|-------------|--------|----------|------------------------|
| Isolate ID                                      | D-ribose | D-glucose | D-fructose | D-mannose | N-acetyl<br>glucosamine | Amygdalin | Arbutin | Esculin<br>ferric<br>citrate | salicin | D-cellobiose | D-maltose | D-Saccharose | D-trehalose | Amidon | Glycogen | Potassium<br>gluconate |
| FSL H7-0353                                     | +        | +         | +          | -         | +                       | +         | +       | +                            | +       | +            | +         | -            | +           | +      | +        | +                      |
| FSL H8-0032                                     | +        | +         | +          | -         | +                       | +         | +       | +                            | +       | +            | +         | -            | +           | +      | +        | +                      |
| FSL P2-0415                                     | +        | +         | +          | +         | +                       | -         | +       | +                            | +       | +            | +         | -            | +           | +      | +        | -                      |
| FSL P2-0558                                     | +        | +         | +          | -         | +                       | -         | +       | +                            | +       | +            | +         | -            | +           | +      | +        | -                      |
| FSL P4-0569                                     | +        | +         | +          | -         | +                       | -         | +       | +                            | +       | +            | +         | -            | +           | +      | +        | -                      |
| FSL M7-0044                                     | +        | +         | +          | -         | +                       | -         | +       | +                            | +       | +            | +         | -            | +           | +      | +        | -                      |
| FSL M7-0938                                     | +        | +         | +          | -         | +                       | -         | +       | +                            | +       | +            | +         | -            | +           | +      | +        | -                      |
| FSL M7-1251                                     | +        | +         | +          | -         | +                       | -         | +       | +                            | +       | +            | +         | -            | +           | +      | +        | -                      |
| FSL W8-0169                                     | +        | +         | +          | -         | +                       | -         | +       | +                            | +       | +            | +         | -            | +           | +      | +        | -                      |
| FSL J3-0113                                     | +        | +         | +          | -         | -                       | -         | +       | +                            | +       | +            | +         | -            | +           | +      | +        | -                      |
| FSL K6-0069                                     | +        | +         | +          | -         | +                       | +         | +       | +                            | +       | +            | +         | -            | +           | +      | +        | -                      |
| ATCC 14579                                      | +        | +         | +          | -         | +                       | -         | +       | +                            | +       | +            | +         | +            | +           | +      | +        | -                      |
